1 **Running title**

2 Meristems in lateral organs

3 **Title**

4 **Differed cell division angle, position of cell proliferative area, and localization of**

5 **ANGUSTIFOLIA3 in lateral organs**

6

7 **Authors**

8 Ayaka Kinoshita<sup>1\*</sup>, Makiko Naito<sup>1\*</sup>, Hirokazu Tsukaya<sup>1</sup>

9 \*Contributed equally to this work

10

11 **Affiliations**

12 <sup>1</sup>Graduate School of Science, The University of Tokyo, Tokyo, Japan

13

14 **Correspondence**

15 Corresponding Author: Hirokazu Tsukaya

16 Contact: tsukaya@bs.s.u-tokyo.ac.jp

17

18 **Word counts & number of figures**

19 Total (main body): 5,730 words

20 Introduction: 993 words

21 Materials and Methods: 1,156 words

22 Results: 1,514 words

23 Discussion: 2,067 words

24 Number of figures: 11

25 **Number of supporting information: 1** **Summary statement**

26 Different lateral organs with different morphology possess different properties of meristems;

27 cell division angles, position of cell proliferative area and AN3 localization patterns.

28

29 **Abstract**

30 Leaf meristem is a cell proliferative zone present in the lateral organ primordia. In this study,  
31 we investigated how the proliferative zone affects the final morphology of the lateral organs.

32 We examined how cell proliferative zones differ in the primordia of planar floral organs and  
33 polar auxin transport inhibitor (PATI)-treated leaves from normal foliage leaf primordia of

34 *Arabidopsis thaliana* with a focus on the spatial accumulation pattern of *ANGUSTIFOLIA3*  
35 (*AN3*), a key element for leaf meristem positioning. We found that organ shape changes by  
36 PATI treatment were correlated to the angle of the cell division plane relative to the leaf  
37 primordia axis in the leaf meristem (cell division angle), but not with leaf-meristem positioning,  
38 size of the leaf meristem, or the localization pattern of AN3 protein. In contrast, different shapes  
39 between sepals and petals compared with foliage leaves were associated with both altered  
40 meristem position associated with altered *AN3* expression patterns and different distributions  
41 of cell division angles. These results suggest that lateral organ shapes are regulated via two  
42 aspects: position of meristem and cell division angles

43

#### 44 **Key words**

45 AN3, cell division, lateral organ, leaf meristem, morphology, polar auxin transport inhibitor

46

#### 47 **Introduction**

48 The shape of leaves plays an important role in determining their photosynthetic  
49 function. Moreover, the shape of floral organs, which are evolutionarily derived from leaves,  
50 is also important for reproductive success. Therefore, the shape of these lateral organs varies  
51 among species to maximize their survival ability in their natural habitats. To understand these  
52 variations, it is important to assess their developmental properties.

53 The center of morphogenesis in plants is the meristem, where active cell division  
54 occurs. The shoot apical meristem (SAM) is essential to produce new above-ground organs. In  
55 terms of lateral organs, especially for leaf primordia, the leaf meristem supplies cells to the leaf  
56 blade; thus, researchers have investigated the nature of the meristem to understand the  
57 morphogenesis of lateral organs (e.g. Esau, 1977; Donnelly et al., 1999; Kazama et al., 2010;  
58 Ichihashi et al., 2011).

59 In many angiosperms, such as *Arabidopsis thaliana*, the leaf meristem is at the base  
60 of each leaf (Tsukaya, 2014; 2021). Cell proliferation initially occurs throughout the leaf  
61 primordium but is restricted to its basal regions as the leaf primordium grows further (Donnelly  
62 et al., 1999; Kazama et al., 2010). The control on the restriction of the cell proliferation zone  
63 is not completely understood. However, a transcriptional coactivator called *ANGUSTIFOLIA3*  
64 (*AN3*)/GRF-INTERACTING FACTOR1 (*GIF1*), which encodes a protein that is homologous  
65 to the human synovial sarcoma translocation protein (Horiguchi et al., 2005), is considered to  
66 positively control cell proliferation in leaf primordia. The spatial patterns of *AN3*/*GIF1*  
67 (simplified to *AN3*, hereafter) accumulation at the base of leaf primordia match the cell

68 proliferation zone, suggesting that AN3 may act as an important determinant in positioning the  
69 leaf meristem (Horiguchi et al., 2005; Kawade et al., 2017). Cell division angles in the AN3-  
70 expressing region, except for areas along the margin and vasculature, were observed to be  
71 randomized (Yin and Tsukaya, 2016), which may contribute to the two-dimensional expansion  
72 of the leaf lamina. AN3 protein moves cell-to-cell (Kawade et al., 2013), forms a gradient along  
73 the proximal-distal axis on the leaf, with the leaf base presenting the highest concentration of  
74 AN3 protein (Kawade et al., 2017) and thus is involved in the positioning of the leaf meristem.  
75 However, how AN3 expression is restricted to the basal part of leaf primordia is still unknown  
76 (Tsukaya, 2021).

77 AN3 seems to be also involved in the morphogenesis of each floral organ (Lee et al.,  
78 2009, 2014). A petal in the *an3* mutant has a smaller number of cells and a narrower shape than  
79 that of the wild type (Lee et al., 2009), as seen in the foliage leaves, suggesting a common role  
80 of AN3 in leaf and petal primordia. However, the past studies indicated that the position of the  
81 meristematic activity in the petal primordia is marginal/apical in *A. thaliana* (e.g., Dinneny et  
82 al., 2004), which is clearly different from the leaf primordia. Precisely said, the cell  
83 proliferation is observed in the entire primordia of the petal organ at first, and then in the distal  
84 region in later stages, differed from that of leaf primordia (Disch et al., 2006; Anastasiou et al.,  
85 2007). Thus, if AN3 has the same role in the positional determination of the meristematic zone  
86 in petal primordia, AN3 proteins are expected to accumulate apically and not basally in petal  
87 primordia; however, no previous studies have examined it. Marginal/apical positioning of the  
88 meristematic zone in petals may be an ancestral character that is directly comparable to the  
89 apical positioning of SAM (Boyce, 2007). Although the basal positioning of the leaf meristem  
90 is common in angiosperms, marginal/apical positioning in leaf primordia is also known in some  
91 ferns and gymnosperms. Therefore, a comparison of leaf primordia with floral organ primordia  
92 of the same species, with special emphasis on AN3 expression, may contribute toward  
93 understanding the roles and evolutionary history of differences in the positioning of cell  
94 proliferation activity in the primordia of these lateral organs.

95 In relation to the above-mentioned positioning of the meristematic zones in lateral  
96 organs, venation pattern is also an evident difference between the leaves of angiosperms, ferns,  
97 and gymnosperms (Boyce, 2007). In the lateral organs of ferns and gymnosperms harboring  
98 meristems along the apical margin, the leaf vein shows a bifurcated pattern and is open at the  
99 end. In contrast, lobed and closed patterns are common in eudicots including *A. thaliana*;  
100 parallel patterns are common in monocots (Dengler and Kang, 2001). Based on this correlation,

101 an interaction between spatial control of the leaf cell proliferation zone and leaf venation  
102 pattern has been suggested (Boyce, 2007).

103 How the spatial control of the leaf cell proliferation zone and leaf venation patterns  
104 are interconnected? In addition, are these indeed correlated? If we refer to the earlier-mentioned  
105 AN3, the cell division orientation is randomized in leaf meristem, where AN3 localized, except  
106 for the local regions along veins and leaf margin where active auxin flow is recognized (Yin  
107 and Tsukaya, 2016). This might suggest a missing link between the spatial control of the leaf  
108 cell proliferation zone and leaf venation pattern, but no prior studies have investigated this  
109 possibility.

110 In vein development in the leaf, biosynthesis and transportation of the plant hormone  
111 auxin (indole-3-acetic acid, IAA) plays an important role (Cheng et al., 2006). For example,  
112 *GNOM* and *PIN-FORMED (PIN)* genes that control polar auxin transport (PAT) (Verna et al.,  
113 2019) regulate vein formation during leaf development. Members of the PIN family have been  
114 extensively studied as major factors in PAT, the most famous being PIN1 (Okada et al., 1991).  
115 Mutations in many *PIN* genes induce defects in leaf vein patterns, with wide and bifurcated  
116 midveins and altered leaf blade shapes (Sawchuk et al., 2013). Similarly, mutants with an  
117 abnormal venation pattern mostly show altered leaf shapes in *A. thaliana* (Candela et al., 1999).

118 Many PAT inhibitors (PATIs) have been used to examine the role of PAT in plant  
119 organogenesis, including 2,3,5-triiodobenzoic acid (TIBA) and N-1-naphthylphthalamic acid  
120 (NPA). Through indirect evidence, they bind to the same auxin efflux carriers to inhibit their  
121 activity (Teale and Palme, 2018). When plants are treated with PATI, their leaves exhibit  
122 abnormal leaf venation patterns, including very thick midveins and marginal veins, similar to  
123 that of *pin1* mutants (Sieburth, 1999). In addition, the leaf shape becomes rounder and shorter  
124 than that of control plants. However, to date, no study has examined the effect of PATI on the  
125 cell proliferation pattern in leaf primordia.

126 To fully understand the morphogenesis process of lateral organs, it is necessary to  
127 investigate the role of the lateral organ meristem on the final organ shape and factors that affect  
128 the properties of meristems. In this study, we chose PATI-treated leaves and floral organs as  
129 models of leaves with altered morphology and venation pattern; and investigated the spatial  
130 position of cell proliferative area, cell division angle, and possible factors that control the  
131 properties of lateral organ meristems using AN3 as a key clue.

132

133

## 134 **Results**

### 135 Change in the length of cell proliferation zone

136 Firstly, we examined whether PATI treatment affects leaf shape via changes in leaf meristem  
137 positioning in *A. thaliana*. In the PATI-treated plants, the leaves became shorter and rounder  
138 than those of the control plants (**Fig. 1D-F, 2**). The leaf vein pattern also differed in PATI-  
139 treated leaves (**Fig. 1D-F**); namely, the midvein was widened, the lateral veins ran parallel to  
140 each other, and the veins adjacent to leaf margins were also widened, indicating drastic changes  
141 in leaf organogenesis. These observations are consistent with those of previous reports  
142 (Mattsson et al., 1999; Sieburth, 1999; Sawchuk et al., 2013).

143 To investigate the effect of inhibition of PAT on the leaf meristem, the cell proliferation  
144 zone was observed in the leaf primordia of PATI-treated plants. The *CYCB1;1:: $\beta$ -*  
145 *glucuronidase* (*GUS*) line is used to visualize dividing G2-M phase cells (Donnelly et al., 1999).  
146 The first and second rosette leaves of 6 days after sowing stage (DAS) seedlings for control  
147 plants and 7 DAS seedlings for PATI-treated plants were used for this experiment, considering  
148 the growth retardation observed in the PATI-treated plants.

149 In the PATI-treated plants, the cell proliferation zone remained in the proximal  
150 position, similar to the control plants (**Fig. 1A-C**). The images were processed to further  
151 examine the positioning of the cell proliferation zone (**Fig. 3**). We observed that both the length  
152 of the cell proliferation zone from the leaf base and the ratio of cell proliferation zone to the  
153 total leaf length were found to be increased in PATI-treated leaves (**Fig. 3C, D**).

154

### 155 AN3 mRNA and AN3 protein localization in leaf primordia

156 To investigate how the length of the cell proliferation zone increased, we examined  
157 the localization of *AN3* expression. As AN3 protein can move between cells, two lines, *an3-*  
158 *4/pAtAN3::AN3-GREEN FLUORESCENT PROTEIN (GFP)* and *an3-4/pAtAN3::AN3-3xGFP*,  
159 were used for the observation. The former can detect actual protein localization, whereas the  
160 latter is used to monitor mRNA localization because it represents an accumulation of the  
161 protein without cell-to-cell movement ability (Kawade et al., 2013, 2017). The first and second  
162 rosette leaves of 5 DAS seedlings were used for this analysis.

163 We observed that the overall localization of AN3 under PATI treatment did not change  
164 from that of the control; it remained in the proximal region (**Fig. 4A-L**). This confirms the  
165 observation in the cell proliferation zone described above. The size of the *AN3*-expressing  
166 regions was also measured using the same image processing method used for the analysis of  
167 the cell proliferation zone. Consequently, the *AN3*-mRNA expressing regions, monitored by

168 the presence of the AN3-3xGFP signal, were slightly longer in the PATI-treated leaves than in  
169 control (**Fig. 4M**). However, AN3 protein localization of TIBA- or NPA-treated plants did not  
170 show a statistical difference from that of control plants (**Fig. 4M**). Therefore, irrespective of  
171 changes in *AN3* mRNA expression pattern, the spatial gradient of AN3 protein along the  
172 longitudinal axis of leaf primordia did not change. Therefore, the influence of PATI treatment  
173 on the AN3 protein accumulation pattern is rather limited.

174 On the other hand, when *an3-4/pAtAN3::AN3-3xGFP* were treated with PATI, we  
175 recognized that *AN3* localization was missing in the vasculature region. This missing  
176 localization was also observed in control conditions, but in PATI-treated leaves, the vasculature  
177 was very thick, and therefore, the absence was recognizable (**Figs. 1D-F, 4**).

178

#### 179 Cell division angles in leaves

180 To understand how PATI treatment caused the changes in size or pattern of the cell  
181 proliferation zone and the leaf shape, analysis of cell division angles was performed using the  
182 *gll-s92f* mutant and *gll-s92f/an3-4* double mutants. We chose *gll-s92f* mutants that lacked  
183 trichomes as a control WT because trichomes obstruct cell division plane observation using  
184 aniline blue staining (**Fig. S1**). The angles were determined against the proximal-distal axis,  
185 starting from the leaf base and parallel to the midvein for the first and second rosette leaves of  
186 7 DAS seedlings (**Fig. 5**). As a result, a variation in cell division angle patterns was observed  
187 (**Fig. 5A**). In the control WT plants, the cell division angle peaked at around 130°–140° (**Fig.**  
188 **5A**). In PATI-treated leaves, this peak was less evident, and cell division was likely randomized  
189 (**Fig. 5A**). This may have contributed to changes in leaf shape, with rounder and shorter leaves,  
190 when treated with PATI (**Figs. 1D-F, 2A**).

191 We performed a cell division angle investigation also for the *an3-4* mutant plants. In  
192 the *an3-4* mutant without PATI, the peak of cell division angle was around 140–150°, which  
193 differed from that of the WT (**Fig. 5A, B**), suggesting that AN3 might shift the cell division  
194 angle to smaller angles, i.e., a shift from proximo-distal to mediolateral direction. This angle  
195 shift can explain why the *an3* leaves are narrower than WT leaves. In the *an3* mutant treated  
196 with PATI, however, the distribution of cell division angle became similar to that of WT plants  
197 treated with PATI (**Fig. 5A, B**), indicating that the randomizing effect of PATI on cell division  
198 angle is superior to the effect of the *an3* mutation biasing cell division angle to the proximo-  
199 distal axis. In both WT and *an3*, the effects of PATI on the cell division angle seem to be similar  
200 between TIBA and NPA, but slightly stronger in NPA than TIBA (**Fig. 5A, B**).



201

## 202 The position of cell proliferative area in floral organs

203 Then, we examined floral organs as modified leaves. Although floral organs such as  
204 sepals, petals, stamens, and carpels are homeotic to leaves, their shapes are different. Even  
205 between sepals and petals, both of which are planar organs, there are distinct differences in  
206 shape in *A. thaliana*. For example, in the distal part, the sepal is narrower, and the petal is wider,  
207 while foliage leaves are narrower in the distal part, similar to sepals.

208 We observed cell proliferation patterns in planar floral organ primordia to investigate  
209 whether these patterns might influence the difference in the final organ shape. To visualize  
210 dividing cells in floral organs, we used EdU. In a sepal primordium, cell division was observed  
211 in the basal part of the organ primordia through the observed developmental stages (**Fig. 6**).  
212 The position of cell proliferative area was similar to that of leaf primordium investigated in  
213 previous studies (e.g., Donnelly et al., 1999, Kawade et al., 2017) (**Fig. 1**). In contrast, cell  
214 division in the petal primordia was observed in the whole organ when the organ was around  
215 100–150  $\mu\text{m}$  in length and the distal and marginal regions when the organ was around 400  $\mu\text{m}$   
216 in length (**Fig. 6**), which marked a clear difference from that of leaves and sepals.

217

## 218 AN3 protein localization in floral organs

219 As AN3 is a key regulator of the leaf meristem position, we suspected that AN3 protein  
220 accumulation patterns may be different between leaves and planar floral organs, which have  
221 different positions of the cell proliferative area. AN3-GFP signals were only observed in the  
222 basal part of sepal organ primordia, whereas the signals were observed in the entire petal organ  
223 primordia at first, and then in the distal region in later stages. Moreover, in the petal primordia,  
224 sparse signals were also observed in the central region and the basal part in the later stage 9  
225 (**Fig. 6**), where EdU signals were rarely observed.

226

## 227 Phenotype of *an3* mutant in sepal

228 It is reported that *an3* mutants have narrower petals and a smaller number of cells than  
229 that of the Col-0 wild type (WT) (Horiguchi et al., 2005; Lee et al., 2009), but the sepal  
230 phenotype has not been investigated. The above-mentioned similarity in the AN3 protein  
231 accumulation pattern and proliferative area in the sepal primordia strongly suggested that the  
232 AN3 is also involved in meristematic regulation in the sepal. In order to investigate whether  
233 AN3 is involved in meristematic regulation as in leaf meristem in sepal primordia, we  
234 compared the phenotype of *an3-4* and the WT in the sepals (**Fig. 7A, B**). The area of the organ

235 was smaller in *an3* than in the WT (**Fig. 7C**). We also observed that the *an3* mutant had fewer  
236 complex veins as compared to that of the WT, which was evaluated based on the number of  
237 secondary and higher veins in the m-shaped or two n-shaped primary veins (**Fig. 7D, E**).

238

### 239 Cell division angles in floral organs

240 To know the possible contribution of biased cell division angle on the final shape of  
241 floral organs, cell division angle analysis was conducted in the sepals and petals from flowers  
242 at stages 8–10 where active cell proliferation is known (Alvarez-Buylla et al., 2010). The  
243 distribution pattern of cell division angle in planar floral organs was unique in showing loose  
244 double peaks (**Fig. 8A**) that is different from the cell division angle in leaves, which had one  
245 peak (**Fig. 5A, B**). Irrespective of the similarity between sepals and leaves in terms of  
246 localization of the cell proliferation zone, the overall tendency of cell division in sepals was  
247 similar to that of petals. This suggests that the pattern of cell division angles is not associated  
248 with the localization of the cell proliferation zone but with organ identity.

249 To understand further the unique cell division patterns in these floral organs, we also  
250 analyzed the spatial distribution of the cell division angles in the primordia (**Fig. 8B**). As a  
251 result of the sepal primordia, the cell divisions within the 60°–90° range, which were divisions  
252 in the mediolateral direction of the primordia, were identified more distally than the divisions  
253 that corresponded to the 140°–180° range, which were divisions in the proximo-distal direction  
254 (**Fig. 8B**), which may contribute to the oval-shaped sepal primordia. On the other hand, in the  
255 petals, the cell divisions within the 60°–90° range, which were divisions in the mediolateral  
256 direction of the primordia, were identified mostly in the central regions of the petal primordia.  
257 The divisions that corresponded to the 140°–180° range were identified mostly in the marginal  
258 regions of the petal primordia (**Fig. 8B**).

259

### 260 **Discussion**

261 In this study, we examined how cell proliferative zones differ in the primordia of PATI-  
262 treated leaves and floral organs from normal foliage leaf primordia of *A. thaliana* with a focus  
263 on the spatial expression pattern of *AN3*, a key element for leaf meristem positioning (Kawade  
264 et al., 2010). We identified that organ shape variation by PATI treatment cannot be attributed  
265 to changes in leaf-meristem positioning, size of the leaf meristem, or the expression pattern of  
266 *AN3* but is rather attributed to altered cell division angles in the leaf meristem. Interestingly,  
267 the *an3* mutation biased cell division angle to the proximo-distal axis in the leaf meristem,  
268 whereas PATI treatment randomized the angle. These effects on the cell division angle are



269 reasonable considering that the *an3* has narrower leaves and PATI-treated leaves are shorter  
270 and rounder (**Figs. 1, 2, 4**). Because polar auxin flow is highly plausible to polarize the cell  
271 division angle (Yin and Tsukaya 2016; reviewed in Dhonukshe et al. 2005), the observed  
272 phenomena could be explained as follows: AN3 randomized the cell division angle (or shift  
273 the angle from proximo-distal to mediolateral direction) against the auxin-dependent polarity;  
274 PATI randomized the cell division angle by cancelling the auxin flow. Since along the  
275 vasculatures *AN3* mRNA expression was not observed (**Fig. 1D-F**), polarized cell division  
276 angle along the vasculature in the WT (Yin and Tsukaya 2016) could be explained by the  
277 absence of AN3.

278 Different shapes of sepals and petals compared with foliage leaves were found to be  
279 correlated with both altered meristem position associated with altered *AN3* spatial expression  
280 patterns and different distributions of cell division angles. Overall, our results strongly suggest  
281 that lateral organ shapes are regulated via two aspects: position of meristem and cell division  
282 angles; the former is mainly governed by the *AN3* expression pattern. In the following sections,  
283 several aspects of the above findings are discussed.

284

#### 285 The position of leaf meristem in PATI-treated plants

286 When *A. thaliana* plants were treated with PATI, both the cell proliferation zone and  
287 *AN3*-expression zone still sit in the proximal part of leaf primordia. It was also observed that  
288 under the PATI treatment the *AN3* mRNA expression zone was slightly expanded to the distal  
289 direction in the expression zone ratio, although the final AN3 protein distribution remained  
290 unchanged (**Fig. 4M, N**). As previously reported (Sieburth, 1999) and confirmed here (**Figs. 1-**  
291 **3**), PATI-treated leaves were rounder and shorter, whereas a longer proliferation zone would  
292 be expected to produce a longer leaf if the other aspects were not changed. Instead, we found  
293 that changes in the cell division angles could be attributed to the altered leaf shape.

294 We also observed that the *AN3* promoter was not expressed in leaf veins (**Fig. 4A-L**).  
295 This trend was clearly seen in PATI-treated leaves as well as in control conditions; however, it  
296 was not evident in control conditions because the veins were much thinner than those of PATI-  
297 treated leaves (**Fig. 1D-F**). This may happen if *AN3* expression is shut down in differentiated  
298 vascular cells, which may imply that the vasculature differentiation by auxin is superior to cell  
299 proliferation maintenance by AN3.

300

### 301 Cell division angle and leaf shape

302 Cell division is an important factor in both leaf development and leaf vein architecture  
303 (Kang et al., 2007). In this study, analysis of the cell division angle revealed that the pattern  
304 differed between PATI-treated plants and control plants (**Fig. 5A**). This difference in the pattern  
305 could be a cause for the differences in leaf shape. In comparison with control leaf primordia  
306 that had major division angles in 130°–140°, PATI-treated leaf primordia had dispersed  
307 division angles in many directions, forming a round and short leaf, which matched the  
308 phenotype (**Figs. 1D-F, 3**). This suggests that auxin flow regulates leaf shape via controlling  
309 cell division orientation in the leaf meristem. It has been shown that the presence of  
310 vasculatures is important in determining cell division patterns (Yin and Tsukaya, 2016).  
311 Therefore, the thickened midveins, where many veins running in the same direction along  
312 proximal-distal axis observed in PATI-treated leaves, may have indirectly affected the cell  
313 division angle.

314

### 315 Determining cell division angle in leaves

316 In this study, two components changed the cell division angle: PAT and AN3. When  
317 PAT was inhibited, the peak in the cell division angle distribution became less evident (**Fig.**  
318 **5A**). As auxin flow controls vascular cell polarity (Linh et al., 2018) it is possible that the cells  
319 divide in the direction of auxin flow. In addition, both NPA and TIBA affect actin dynamics  
320 (Teale and Palme, 2018; Zou et al., 2019) that can affect cytoskeletal regulation of cytokinesis,  
321 and may be one of the underlying reasons for the change in cell division angle.

322 We observed the *an3* mutant tended to divide around 140°–150°, which partially  
323 explains the narrow leaf phenotype of *an3* mutants, as cell division along the proximal-distal  
324 axis was increased (**Fig. 5B**). In a previous report, the phase of cell division was divided into  
325 two phases: the first has more divisions along the proximal-distal axis than the second phase  
326 (Horiguchi et al., 2011). In the latter phase, except for marginal area and local areas along veins  
327 cell division orientation was randomized (Yin and Tsukaya 2016). Furthermore, in *an3* mutants,  
328 the transition from the first to the second phase does not occur before the termination of cell  
329 division activity (Horiguchi et al., 2011). The shift in the peak of the cell division angle  
330 observed in the *an3* mutant would reflect this failure in shifting to the second phase of cell  
331 proliferation, which confirms the results of previous studies. Therefore, AN3 functions in the  
332 transition to the second phase of cell division, and consequently, cells tend to divide along the  
333 proximal-distal axis in the absence of AN3. Precisely, AN3 might promote the shift of the cell  
334 division angle from the proximo-distal preference to the randomized one.

335 In addition, in *an3* mutants treated with PATI, the cell division angles were similar to  
336 those of WT treated with PATI (**Fig. 5A, B**). This suggests that the randomizing effect of PATI  
337 on cell division angle is superior to that of AN3 and that the loss of PAT results in cell division  
338 in random directions irrespective of the presence or absence of AN3. This might be explained  
339 as follows: AN3 functions for the phase shift from proximo-distal preference to randomized  
340 one; polar auxin transport is directly or indirectly involved in the polar-dependent cell division  
341 angle in both phases; loss of AN3 activity and PAT results in more proximo-distal and  
342 randomized cell division, respectively. If the PAT-dependent polarity axis is lost, even in the  
343 *an3*, the cell division angle is randomized.

344

#### 345 Position of meristematic tissue determines the final floral organ shape

346 The final organ shape could be determined by various factors, such as acceleration  
347 and deceleration of proliferation, oriented cell division and expansion, and the meristem  
348 position (Tsukaya, 2018). In this study, we showed that the position of the cell proliferative  
349 area was completely different between sepals and petals, which are both modified leaves but  
350 morphologically different. The petal of *A. thaliana* with a modest fan shape has a proliferative  
351 region in the distal part, which is similar to ferns with fan-shaped morphology, which is rare in  
352 angiosperm leaves, coinciding with leaf meristem at the apical margin (Boyce, 2007; Tsukaya,  
353 2014, 2018). This suggests that the morphological differences between sepals and petals could  
354 be at least partly explained by the meristematic position in each organ.

355 Although predominant cell division occurs in submarginal plate meristem to widen  
356 the leaf blade area in leaf primordia (e.g., Poethig and Sussex, 1985), it was also shown that  
357 marginal meristem residing in the margin of the primordia is present (Alvarez et al., 2016;  
358 reviewed in Tsukaya 2021). Alvarez et al. (2016) showed that when NGATHA and  
359 CINCINNATA-class-TCP were knocked down, indeterminate marginal growth occurred in the  
360 entire margin of the leaf blade, suggesting potential meristem activity in this area. Interestingly,  
361 marginal growth occurs only in the distal region of floral organs in their system, including  
362 sepals and petals. In terms of WT petals, active cell division occurs in the distal margin in the  
363 first place (Sauret-Güeto et al. 2013; our present study, **Fig. 6**); therefore, the marginal  
364 meristem may contribute more than leaves or sepals. Since the activity of meristem in the distal  
365 marginal area of a blade has been discussed as an ancestral character (Floyd and Bowman,  
366 2010), petals may retain this developmental character (Boyce, 2007). We observed EdU signals  
367 in the entire margin of the petal primordia at least until the organ size was 400  $\mu\text{m}$  in length,  
368 even in the proximal region. Considering the results of Alvarez et al. (2016) on leaf and floral

369 organ primordia, the nature of proliferative cells in marginal areas is different among different  
370 lateral organs.

371

### 372 Role of AN3 in planar lateral organs

373 Several key genes are known to positively control cell proliferation in the leaf  
374 meristem (Nakata et al., 2012; Ichihashi and Tsukaya, 2015; Tsukaya, 2021). Among them, the  
375 AN3-protein-accumulated region matches with the cell proliferative area in leaf primordia  
376 (Kawade et al., 2017), suggesting that AN3 is an important determinant of the leaf meristem  
377 position. Moreover, the smaller size of a petal in *an3* or triple knockdown of the GIF family  
378 (Kim and Kende, 2004; Horiguchi et al., 2005; Lee et al., 2009) suggested that AN3 is also  
379 involved in the promotion of cell proliferation in the petal. However, its functioning zone in  
380 primordia has not been well investigated. In this study, we showed that the AN3-expressed  
381 region overlapped with the cell proliferative area in both sepals and petals, as observed in leaf  
382 primordia. In addition, we first showed that traits of sepals in *an3* mutants are likely to have  
383 fewer cells as petals or foliage leaves. These results suggest that AN3 functions as a  
384 determinant of the meristematic position and activity in all planar floral organs. However, in  
385 terms of petal primordia, AN3 protein signals were also observed in the less proliferative area.  
386 This might be due to a lack of associating transcriptional factors such as GROWTH  
387 REGULATING FACTOR5 (GRF5), which is necessary to promote cell proliferation in leaf  
388 primordia (Horiguchi et al., 2005), in such regions. Alternatively, because signals in the  
389 proximal part were not as strong as those in the distal region, the concentration of AN3 proteins  
390 might not be enough to promote cell division to the extent that EdU was incorporated.

391 In the past, JAGGED (*JAG*) was examined as a candidate of a regulatory gene for the  
392 specific morphology in the *Arabidopsis* petal that differed from leaves because the loss-of-  
393 function *jag* mutant has narrower and shorter petals; the *JAG* overexpressor has larger petals;  
394 its mRNA is expressed distal margin (Sauret-Güeto et al. 2013). At that time point, *JAG* was  
395 the only candidate ‘organizer’ that presented the petal with a pattern of growth orientations that  
396 fans out. However, AN3 has become an additional candidate that fulfills the required, above-  
397 mentioned conditions. Indeed, *AN3* was identified as a direct target of *JAG* (Schiessl et al.  
398 2014). The role of AN3 as the ‘organizer’ sensu Sauret-Güeto et al. (2013) should be examined  
399 in the future.

400 To fully understand the mechanisms of flower organogenesis, the regulation of  
401 meristem position by floral organ identity genes needs to be investigated (Coen and

402 Meyerowitz, 1991). Honma and Goto (2001) and Pelaz et al. (2001) revealed that when A genes  
403 (*APELATA1*) and B genes (*APELATA3* and *PISTILATA*) were ectopically expressed together  
404 with *SEPALLATA2/3* in rosette leaves, the rosette leaves obtained petal identity, and the color  
405 and cell shape became petal-like. However, the transformed petaloid organ was not fan-shaped  
406 but had a taper off shape, which was similar to rosette leaves, cauline leaves, and sepals. This  
407 suggests that factors other than the floral identity homeotic genes control the final organ shape.  
408 Revealing the mechanisms of *AN3* expression control might shed light on which factors are  
409 involved in the resulted different morphology among different organs.

410 The leaves of some gymnosperms and ferns are considered to grow from the  
411 meristem in the distal margin. The positioning of these meristems may also be determined by  
412 the spatial distribution of leaf meristem-controlling genes, such as *AN3/GIF1*. As *GIF* family  
413 genes exist in most eukaryotic organisms, including the basal land plants, *Marchantia*  
414 *polymorpha*, *Physcomitrium patens*, and *Sellaginella moellendorffi* (Kim and Tsukaya, 2015),  
415 further analyses of the *GIFs* in gymnosperms and ferns could answer this question.

416

#### 417 Determining cell division angle in floral organs

418 In this study, the cell division pattern in floral organ primordia was investigated for its  
419 possible roles in each floral organ morphology. Both the petals and sepals showed a pattern  
420 with loose twin peaks in the distribution of cell division angles, which was different from that  
421 of leaf primordia that had a clear single peak (**Fig. 6**). This is an interesting new finding on the  
422 meristems in these primordia. In addition, we found that in the petal the cell division occurred  
423 at 60°–90° angle in the central regions, and the cell division with the 140°–180° angle was  
424 mostly in the marginal regions, whereas such a pattern was not seen in the sepals (instead  
425 longitudinal distribution was observed, **Fig. 8**). This difference may cause variation in shape  
426 between sepals and petals, with the distal part being wider than the proximal part, which may  
427 be caused by the cell divisions that contributed to width in the marginal regions. Although both  
428 sepal and leaf primordia have a cell proliferation zone in the basal region, the cell division  
429 angle was controlled differently, which may imply that cell division angles depend on organ  
430 identity and affect their final shapes.

431 Overall, our results imply that lateral organ shapes are likely to be regulated by two  
432 factors: the position of the cell proliferative zone governed by the spatial expression pattern of  
433 *AN3* and cell division angles. Therefore, even in one species, by changing these two factors, a

434 variety of lateral organ shapes could be performed. To test this idea, future studies with a  
435 combination of genetic manipulation and computer simulation should be carried out.

436

## 437 **Materials and Methods**

### 438 Plant growth

439 For analysis of the leaf primordia, *A. thaliana* Col-0 (WT), or those carrying  
440 *CYCLINB1;1(CYCB1;1)::GUS*, *an3-4*, *an3-4/pAtAN3::AN3-GFP*, *an3-4/pAtAN3::AN3-*  
441 *3xGFP*, *gl-s92f*, or *gl-s92f/an3* were grown on sterile growth medium that contained half-  
442 strength Murashige and Skoog medium (MS, Wako, Osaka, Japan), 1% (w/v) sucrose (Nacalai  
443 Tesque, Kyoto, Japan), and 0.8% (w/v) agar (Nacalai Tesque, Kyoto, Japan) (Wako, Osaka,  
444 Japan) adjusted to pH 5.8 with potassium hydroxide. Approximately, 1 M PATI (TIBA and  
445 NPA) stocks were dissolved in dimethyl sulfoxide and added to the medium to a final  
446 concentration of 10  $\mu$ M. The medium composition was based on that described by Sieburth  
447 (1999).

448 Seeds were sterilized by immersing in a solution of 2% (v/v) Plant Preservative  
449 Mixture<sup>TM</sup> (Plant Cell Technology, Washington, D.C., USA), 0.1% (v/v) Triton X-100 (Nacalai  
450 Tesque, Kyoto, Japan), and 50 mg/L MgSO<sub>4</sub> for 6 h or a solution of 10% (v/v) sodium  
451 hypochlorite (Nacalai Tesque, Kyoto, Japan) and 1% (v/v) Triton X-100 for 5 min and twice  
452 with sterile water prior to plating. The plates were incubated at 24°C under constant  
453 illumination.

454 For analyses of the floral organ primordia, *A. thaliana* Col-0 and *an3-4/pAtAN3::AN3-*  
455 *1xGFP* (Kawade et al., 2013) were sown on rockwool (Toyobo, Osaka, Japan) and grown under  
456 white fluorescent light conditions (ca. 40  $\mu$ mol m<sup>-2</sup> s<sup>-1</sup>) at 22–23°C supplied with water  
457 containing 1 g/L powder Hyponex (Hyponex, Osaka, Japan).

458

### 459 GUS experiments

460 Detection of GUS activity was carried out using 5-bromo-4-chloro-3-indolyl- $\beta$ -D-  
461 glucuronide (X-Gluc) as a substrate. Plant tissue was first placed in 90% (v/v) acetone on ice  
462 for 10 min, washed with sodium phosphate buffer (pH 7.0), and then placed in X-Gluc buffer  
463 solution (0.5 mg/mL X-Gluc, 100 mM NaPO<sub>4</sub> (pH 7.0), 5 mM K<sub>3</sub>Fe(CN)<sub>6</sub>, 5 mM K<sub>4</sub>Fe(CN)<sub>6</sub>,  
464 10 mM EDTA, 0.1% (v/v) Triton X-100) under vacuum for 15 min or more and then placed in  
465 the dark at room temperature (ca. 20°C).

466 After GUS detection, plant tissues were rinsed in 70% (v/v) ethanol and fixed in  
467 ethanol: acetic acid (6:1) solution. After chlorophyll was removed, the tissue was preserved in



468 70% EtOH in the dark. Plant tissues were mounted on slides with chloral hydrate solution (50  
469 g chloral hydrate, 5 g glycerol, 12.5 mL distilled water) (Tsuge et al., 1996) and observed under  
470 a microscope after the tissue became transparent enough.

471

#### 472 AN3-GFP observations

473 Leaf primordia (5 DAS) and flower primordia of *A. thaliana an3-4/pAN3::AN3-GFP*  
474 and *an3-4/pAN3::AN3-3xGFP* lines were fixed in 4% (v/v) paraformaldehyde (PFA) in  
475 phosphate-buffered saline (PBS) with 0.05% (v/v) Triton X-100 by immersing them in the  
476 fixation mixture, deairing them for 10 min (for leaf primordia) or 15 min (twice, for flower  
477 primordia) and placed at 4°C overnight. The samples were then washed in PBS (10 min, twice)  
478 and stored in PBS at room temperature for leaf primordia and 4°C for flower primordia until  
479 observation.

480 The samples were then dissected using a sharp razor under the microscope. Leaf  
481 primordia were mounted on slides with PBS and observed under a confocal microscope  
482 (FV3000; Olympus, Tokyo, Japan) with a GFP filter for leaf primordia and an upright  
483 fluorescent microscope (DM4000; Leica Microsystems GmbH, Wetzlar, Germany) for floral  
484 organ primordia.

485

#### 486 Data analysis on the area of cell proliferative area and AN3-GFP localized area

487 We used a method derived from Kazama et al. (2010) and Ikeuchi et al. (2011) to  
488 determine the position of leaf meristem. First, an image of a leaf with a GUS expression pattern  
489 was prepared. The outer region of the leaf was cropped, and the image was rotated so that the  
490 leaf base was on the left side of the image. Then, the blue region was extracted, and a binary  
491 image was created using ImageJ (<https://imagej.nih.gov/ij/>). The number of white pixels was  
492 counted for each column, and the end of the cell proliferative area along the proximal-distal  
493 axis (hereafter referred to as arrest front) was determined based on the definition of the point  
494 at which the ratio of white pixels was half that of the maximum and farthest from the blade  
495 base. The distance from the leaf base of each arrest front point was plotted for each condition  
496 in a box plot. Statistical analysis was performed using the R software.

497 Similarly, AN3-GFP localized area was determined as follows: first, a series of z-stack  
498 images were stacked using ImageJ software. Stacked images with the outer side of the leaf  
499 were cropped and rotated so that the leaf base was on the left side of the image. The region  
500 with AN3-GFP fluorescence was extracted, and from this image, a binary image was created.  
501 The number of black pixels was counted in each column. The end of the AN3-GFP localized

502 area was determined based on the definition of the point at which the ratio of black pixels was  
503 half that of the maximum and farthest from the blade base. The distance from the leaf base of  
504 each end of the AN3-GFP localized area was divided by the leaf length because of the size  
505 difference between lines. The obtained data were plotted for each condition in a box plot.  
506 Statistical analysis was performed using the R software.

507

#### 508 Observation of Aniline Blue signal

509 We used a method derived from previous studies for the detection of newly formed  
510 cell walls (Kuwabara and Nagata, 2006; Kuwabara et al., 2011). Leaf primordia (7 DAS) of *A.*  
511 *thaliana glabra1(gll)-s92f* and *gll-s92f/an3-4* mutants and Col-0 flower petals and sepals were  
512 first fixed in a mixture of ethanol and acetic acid (4:1, v/v) for 30 min and then rinsed in 100%  
513 ethanol. Then, the samples were immersed in a mixture of ethanol and 100 mM phosphate  
514 buffer (pH 9.0; 1:1, v/v) for 30 min and then in 100 mM phosphate buffer (pH 9.0) for 10 min.  
515 Finally, the samples were immersed in a 0.02% (w/v) solution of aniline blue in 100 mM  
516 phosphate buffer (pH 9.0) for at least 7 days and up to 30 days at 4°C. Leaf primordia were  
517 mounted on slides with the staining solution and observed under a confocal microscope  
518 (FV10C-PSU; Olympus, Tokyo, Japan) under UV excitation with a DAPI (4',6-diamidino-2-  
519 phenylindole) filter. The data were analyzed by taking each angle of the septum wall.  
520 Calculations were performed using Microsoft® Excel.

521

#### 522 Observation of EdU-marked cells

523 We used the Click-iT EdU Alexa Fluor 488 Imaging Kit (Thermo Fischer Scientific,  
524 Waltham, MA, USA) to visualize the cells in S phase. We dissected the inflorescence of *A.*  
525 *thaliana* into several pieces and soaked the flower clusters into 10  $\mu$ M 5-ethynyl-2'-  
526 deoxyuridine (EdU) solution in half-strength MS medium with 1% sucrose for 3 h under  $\sim$ 45  
527  $\mu$ mol m<sup>-2</sup> s<sup>-1</sup> white fluorescent light. The samples were washed with PBS containing 0.1%  
528 Triton X-100 and fixed with FAA (37% [v/v] formaldehyde, 5% [v/v] acetic acid, 50% [v/v]  
529 ethanol) and stored at 4°C. Subsequent fluorescent labeling with Alexa Fluor 488 or 555  
530 (Thermo Fischer Scientific, Waltham, MA, USA) was conducted according to the  
531 manufacturer's instructions. Floral organs were mounted on slides, and fluorescent dye signals  
532 conjugated to EdU were observed under fluorescent microscope (DM4000; Leica  
533 Microsystems GmbH, Wetzlar, Germany).

534

535 **Acknowledgments**

536 We would like to thank MEXT and the Graduate Program for Leaders in Life Innovation  
537 (GPLLI)/World-leading Innovative Graduate Study Program for Life Science and Technology  
538 (WINGS-LST) of the University of Tokyo for providing microscope facilities.

539

540 **Author Contributions**

541 AK, MN, and HT designed the experiments; AK and MN performed the experiments and  
542 analyzed the data; AK, MN, and HT wrote the manuscript.

543

544 **Funding**

545 This research was supported by a Grant-in-Aid for JSPS Fellows (AK, #19J14140) and a Grant-  
546 in-Aid for Scientific Research on Innovation Areas (HT, #25113002 and 19H05672) from  
547 MEXT and GPLLI/WINGS-LST of the University of Tokyo (AK).

548

549 **Conflict of Interest**

550 No conflict of interest.

551

552 **Data Availability**

553 Data is available on request from the authors.

554

555  
556  
557  
558  
559  
560  
561  
562  
563  
564  
565  
566  
567  
568  
569  
570  
571  
572  
573  
574  
575  
576  
577  
578  
579  
580  
581  
582  
583  
584  
585  
586  
587

## References

- Alvarez-Buylla ER, Benítez M, Corvera-Poiré A, Chaos Cador Á, de Folter S, Gamboa de Buen A, Garay-Arroyo A, García-Ponce B, Jaimes-Miranda F, Pérez-Ruiz R V., et al. 2010.** Flower Development. *The Arabidopsis Book* **8**: e0127.
- Alvarez JP, Furumizu C, Efroni I, Eshed Y, Bowman JL. 2016.** Active suppression of a leaf meristem orchestrates determinate leaf growth. *eLife* **5**: e15023.
- Anastasiou E, Kenz S, Gerstung M, MacLean D, Timmer J, Fleck C, Lenhard M. 2007.** Control of plant organ size by KLUH/CYP78A5-dependent intercellular signaling. *Developmental Cell* **13**: 843–856.
- Boyce CK. 2007.** Mechanisms of laminar growth in morphologically convergent leaves and flower petals. *International Journal of Plant Sciences* **168**: 1151–1156.
- Candela H, Martínez-Laborda A, Luis Micol J. 1999.** Venation pattern formation in *Arabidopsis thaliana* vegetative leaves. *Developmental Biology* **205**: 205–216.
- Cheng Y, Dai X, Zhao Y. 2006.** Auxin biosynthesis by the YUCCA flavin monooxygenases controls the formation of floral organs and vascular tissues in *Arabidopsis*. *Genes and Development* **20**: 1790–1799.
- Coen ES, Meyerowitz EM. 1991.** The war of the whorls: genetic interactions controlling flower development. *Nature* **353**: 31–37.
- Dengler N, Kang J. 2001.** Vascular patterning and leaf shape. *Current Opinion in Plant Biology* **4**: 50–56.
- Dinneny JR, Yadegari R, Fischer RL, Yanofsky MF, Weigel D. 2004.** The role of JAGGED in shaping lateral organs. *Development* **131**: 1101–1110. doi:10.1242/dev.00949
- Dhonukshe P, Kleine-Vehn J, Friml J. 2005.** Cell polarity, auxin transport, and cytoskeleton-mediated division planes: who comes first? *Protoplasma* **226**: 67–73.
- Disch S, Anastasiou E, Sharma VK, Laux T, Fletcher JC, Lenhard M. 2006.** The E3 ubiquitin ligase BIG BROTHER controls *Arabidopsis* organ size in a dosage-dependent manner. *Current Biology* **16**: 272–279.
- Donnelly PM, Bonetta D, Tsukaya H, Dengler RE, Dengler NG. 1999.** Cell cycling and cell enlargement in developing leaves of *Arabidopsis*. *Developmental Biology* **215**: 407–419.
- Esau K. 1977.** *Anatomy of Seed Plants, 2nd Edition*. New York: John Wiley & Sons.
- Floyd SK, Bowman JL. 2010.** Gene expression patterns in seed plant shoot meristems and leaves: Homoplasmy or homology? *Journal of Plant Research* **123**: 43–55.

- 588 **Honma T, Goto K. 2001.** Complexes of MADS-box proteins are sufficient to convert leaves  
589 into floral organs. *Nature* **409**: 524–529.
- 590 **Horiguchi G, Kim GT, Tsukaya H. 2005.** The transcription factor AtGRF5 and the  
591 transcription coactivator AN3 regulate cell proliferation in leaf primordia of *Arabidopsis*  
592 *thaliana*. *Plant Journal* **43**: 68–78.
- 593 **Horiguchi G, Nakayama H, Ishikawa N, Kubo M, Demura T, Fukuda H, Tsukaya H.**  
594 **2011.** *ANGUSTIFOLIA3* plays roles in adaxial/abaxial patterning and growth in leaf  
595 morphogenesis. *Plant and Cell Physiology* **52**: 112–124.
- 596 **Ichihashi Y, Kawade K, Usami T, Horiguchi G, Takahashi T, Tsukaya H. 2011.** Key  
597 proliferative activity in the junction between the leaf blade and leaf petiole of *Arabidopsis*.  
598 *Plant Physiology* **157**: 1151–1162.
- 599 **Ichihashi Y, Tsukaya H. 2015.** Behavior of leaf meristems and their modification. *Frontiers*  
600 *in Plant Science* **6**: 1–8.
- 601 **Ikeuchi M, Yamaguchi T, Kazama T, Ito T, Horiguchi G, Tsukaya H. 2011.**  
602 *ROTUNDIFOLIA4* regulates cell proliferation along the body axis in *Arabidopsis* shoot.  
603 *Plant and Cell Physiology* **52**: 59–69.
- 604 **Kang J, Mizukami Y, Wang H, Fowke L, Dengler NG. 2007.** Modification of cell  
605 proliferation patterns alters leaf vein architecture in *Arabidopsis thaliana*. *Planta* **226**: 1207–  
606 1218.
- 607 **Kawade K, Horiguchi G, Tsukaya H. 2010.** Non-cell-autonomously coordinated organ size  
608 regulation in leaf development. *Development* **137**: 4221–4227.
- 609 **Kawade K, Horiguchi G, Usami T, Hirai MY, Tsukaya H. 2013.** *ANGUSTIFOLIA3*  
610 signaling coordinates proliferation between clonally distinct cells in leaves. *Current Biology*  
611 **23**: 788–792.
- 612 **Kawade K, Tanimoto H, Horiguchi G, Tsukaya H. 2017.** Spatially different tissue-scale  
613 diffusivity shapes *ANGUSTIFOLIA3* gradient in growing leaves. *Biophysical Journal* **113**:  
614 1109–1120.
- 615 **Kazama T, Ichihashi Y, Murata S, Tsukaya H. 2010.** The mechanism of cell cycle arrest  
616 front progression explained by a *KLUH/CYP78A5*-dependent mobile growth factor in  
617 developing leaves of *Arabidopsis thaliana*. *Plant and Cell Physiology* **51**: 1046–1054.
- 618 **Kim JH, Kende H. 2004.** A transcriptional coactivator, AtGIF1, is involved in regulating  
619 leaf growth and morphology in *Arabidopsis*. *Proceedings of the National Academy of*  
620 *Sciences of the United States of America* **101**: 13374–13379.

- 621 **Kim, JH. and Tsukaya, H.** (2015). Regulation of plant growth and development by the  
622 GROWTH-REGULATING FACTOR and GRF-INTERACTING FACTOR duo. *Journal of*  
623 *Experimental Botany* **66**, 6093–6107. **Kuwabara A, Backhaus A, Malinowski R, Bauch M,**  
624 **Hunt L, Nagata T, Monk N, Sanguinetti G, Fleming A.** 2011. A shift toward smaller cell  
625 size via manipulation of cell cycle gene expression acts to smoothen arabidopsis Leaf Shape.  
626 *Plant Physiology* **224**: 761–770.
- 627 **Kuwabara A, Nagata T.** 2006. Cellular basis of developmental plasticity observed in  
628 heterophyllous leaf formation of *Ludwigia arcuata* (Onagraceae). *Planta* **224**: 761–770.
- 629 **Lee BH, Ko JH, Lee S, Lee Y, Pak JH, Kim JH.** 2009. The Arabidopsis *GRF-*  
630 *INTERACTING FACTOR* gene family performs an overlapping function in determining  
631 organ size as well as multiple developmental properties. *Plant Physiology* **151**: 655–668.
- 632 **Lee BH, Wynn AN, Franks RG, Hwang Y sic, Lim J, Kim JH.** 2014. The arabidopsis  
633 thaliana GRF-interacting factor gene family plays an essential role in control of male and  
634 female reproductive development. *Developmental Biology* **386**: 12–24.
- 635 **Linh NM, Verna C, Scarpella E.** 2018. Coordination of cell polarity and the patterning of  
636 leaf vein networks. *Current Opinion in Plant Biology* **41**: 116–124.
- 637 **Mattsson J, Sung ZR, Berleth T.** 1999. Responses of plant vascular systems to auxin  
638 transport inhibition. *Development* **126**: 2979–2991.
- 639 **Nakata M, Matsumoto N, Tsugeki R, Rikirsch E, Laux T, Okada K.** 2012. Roles of the  
640 middle domain-specific *WUSCHEL-RELATED HOMEBOX* genes in early development of  
641 leaves in *Arabidopsis*. *Plant Cell* **24**: 519–535.
- 642 **Nelissen H, Eeckhout D, Demuyneck K, Persiau G, Walton A, van Bel M, Vervoort M,**  
643 **Candaele J, De Block J, Aesaert S, et al.** 2015. Dynamic changes in *ANGUSTIFOLIA3*  
644 complex composition reveal a growth regulatory mechanism in the maize leaf. *Plant Cell* **27**:  
645 1605–1619.
- 646 **Okada K, Ueda J, Komaki MK, Bell CJ, Shimura Y.** 1991. Requirement of the auxin  
647 polar transport system in early stages of *Arabidopsis* floral bud formation. *The Plant Cell* **3**:  
648 677–684.
- 649 **Pelaz S, Gustafson-Brown C, Kohalmi SE, Crosby WL, Yanofsky MF.** 2001. *APETALA1*  
650 and *SEPALLATA3* interact to promote flower development. *The Plant Journal* **26**: 385–394.
- 651 **Poethig RS, Sussex IM.** 1985. The cellular parameters of leaf development in tobacco: a  
652 clonal analysis. *Planta* **165**: 170–184.



- 653 **Sauret-Güeto S, Schiessl K, Bangham A, Sablowski R, Coen E. 2013.** JAGGED controls  
654 *Arabidopsis* petal growth and shape by interacting with a divergent polarity field. *PLoS*  
655 *Biology* **11**: e1001550. doi:10.1371/journal.pbio.1001550
- 656 **Sawchuk MG, Edgar A, Scarpella E. 2013.** Patterning of leaf vein networks by convergent  
657 auxin transport pathways. *PLoS Genetics* **9**: e1003294.
- 658 **Schiessl K, Muiñob JM, Sablowski R 2014.** *Arabidopsis* JAGGED links floral organ  
659 patterning to tissue growth by repressing Kip-related cell cycle inhibitors. *Proceedings of the*  
660 *National Academy of Sciences of the United States of America* **111**: 2830-2835.  
661 [www.pnas.org/cgi/doi/10.1073/pnas.1320457111](http://www.pnas.org/cgi/doi/10.1073/pnas.1320457111)
- 662 **Sieburth LE. 1999.** Auxin is required for leaf vein pattern in *Arabidopsis*. *Plant Physiology*  
663 **121**: 1179–1190.
- 664 **Teale W, Palme K. 2018.** Naphthylphthalamic acid and the mechanism of polar auxin  
665 transport. *Journal of Experimental Botany* **69**: 303–312.
- 666 **Tsuge T, Tsukaya H, Uchimiya H. 1996.** Two independent and polarized processes of cell  
667 elongation regulate leaf blade expansion in *Arabidopsis thaliana* (L) Heynh. *Development*  
668 **122**: 1589–1600.
- 669 **Tsukaya H. 2014.** Comparative leaf development in angiosperms. *Current Opinion in Plant*  
670 *Biology* **17**: 103–109.
- 671 **Tsukaya H. 2018.** Leaf shape diversity with an emphasis on leaf contour variation,  
672 developmental background, and adaptation. *Seminars in Cell and Developmental Biology* **79**:  
673 48–57.
- 674 **Tsukaya H. 2021.** The leaf meristem enigma: The relationship between  
675 the plate meristem and the marginal meristem. *The Plant Cell* doi:10.1093/plcell/koab190
- 676 **Verna C, Ravichandran SJ, Sawchuk MG, Linh NM, Scarpella E. 2019.** Coordination of  
677 tissue cell polarity by auxin transport and signaling. *eLife* **8**: e51061.
- 678 **Yin X, Tsukaya H. 2016.** A pulse-chase strategy for EdU labelling assay is able to rapidly  
679 quantify cell division orientation. *The New phytologist* **211**: 1462–1469.
- 680 **Zou M, Ren H, Li J. 2019.** An auxin transport inhibitor targets villin-mediated actin  
681 dynamics to regulate polar auxin transport. *Plant Physiology* **181**: 161–178.  
682

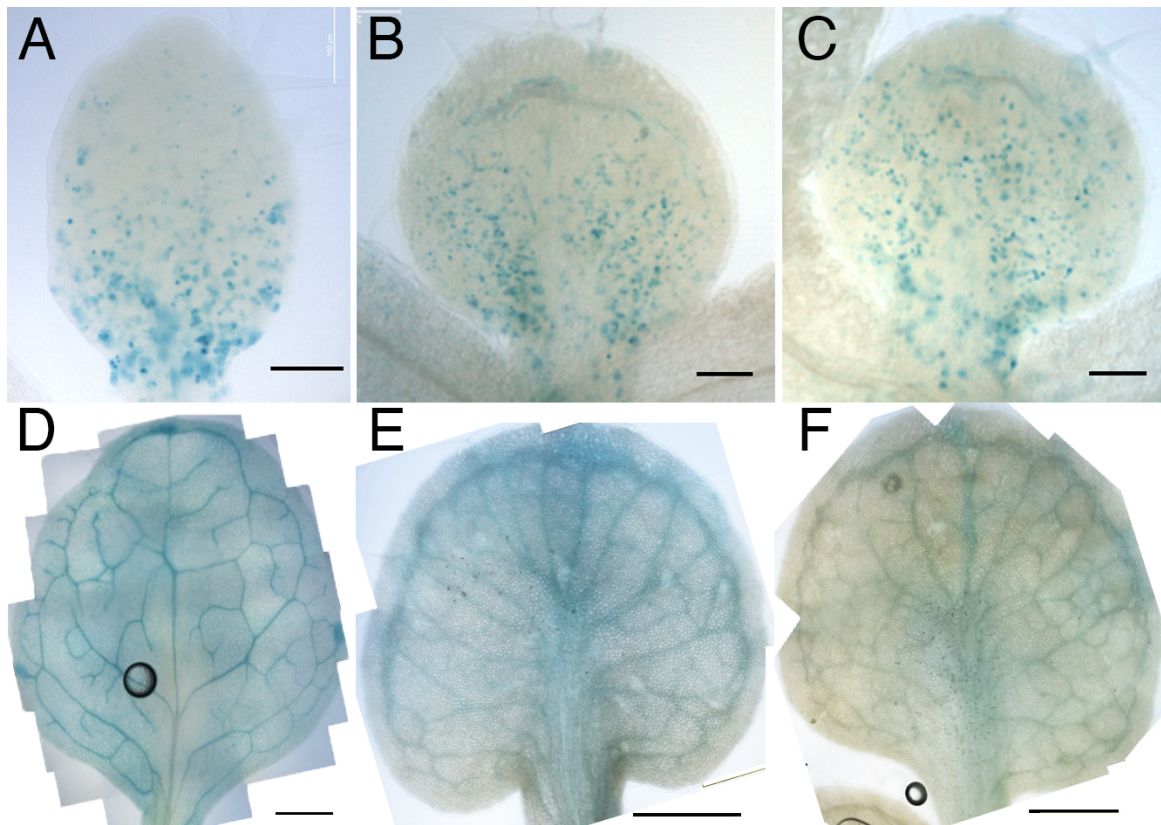

683

684 **Fig. 1** Cell proliferation is visualized by GUS staining in PATI-treated *CYCB1;1::GUS*.

685 A: 6 DAS control, B: 7 DAS TIBA-treated, C: 7 DAS NPA-treated leaf primordia.

686 D: 12 DAS control, E: 12 DAS TIBA-treated, F: 12 DAS NPA-treated leaf primordia. Leaf  
687 primordia of similar lengths were compared.

688 Scale bars: A: 100 μm, B, C: 200 μm, D-F: 500 μm

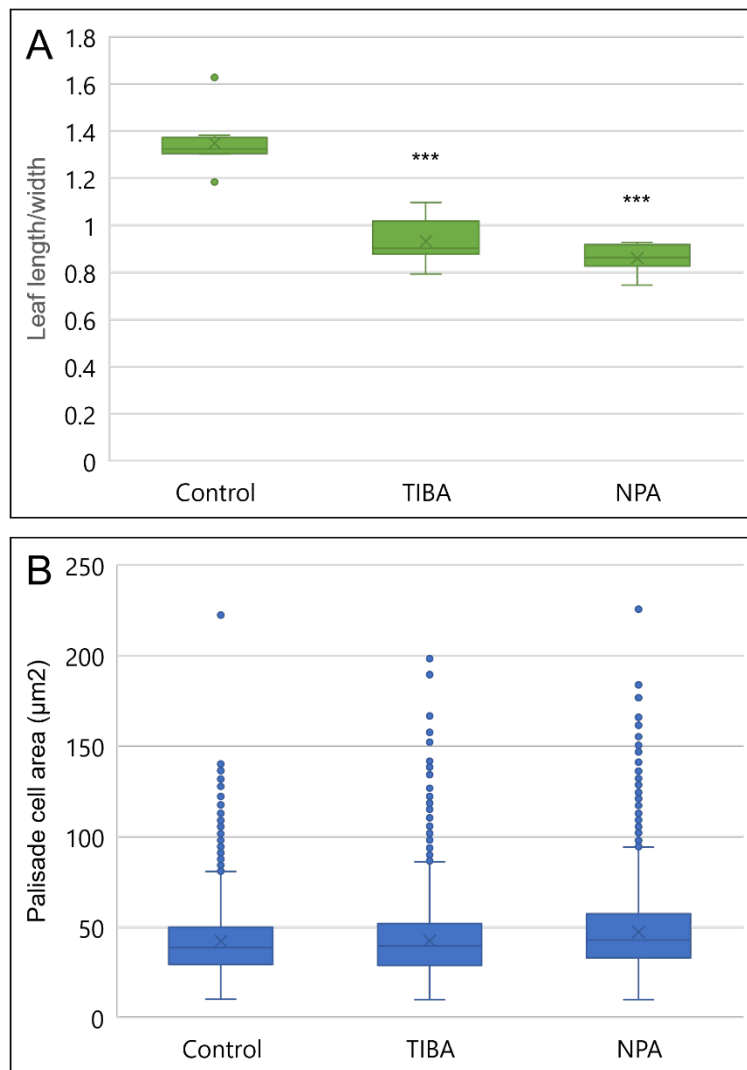

689

690 **Fig. 2**

691 A: Leaf length/width ratio of leaf primordia at cell proliferation stage. Leaf length was  
692 measured after excluding the petiole, as shown in Figure 3A. Leaf width was measured after  
693 the leaf has been flattened out on glass slides.

694 From left to right, data on control (6 DAS), TIBA-treated (7 DAS), and NPA-treated (7 DAS)  
695 leaf primordia are shown,  $n = 4$ , Dunnett's test \*\*\*:  $p < 0.001$

696

697 B: Palisade cell area for each condition. From left to right, data on control (6 DAS), TIBA-  
698 treated (7 DAS), and NPA-treated (7 DAS)  $n = 4$

699

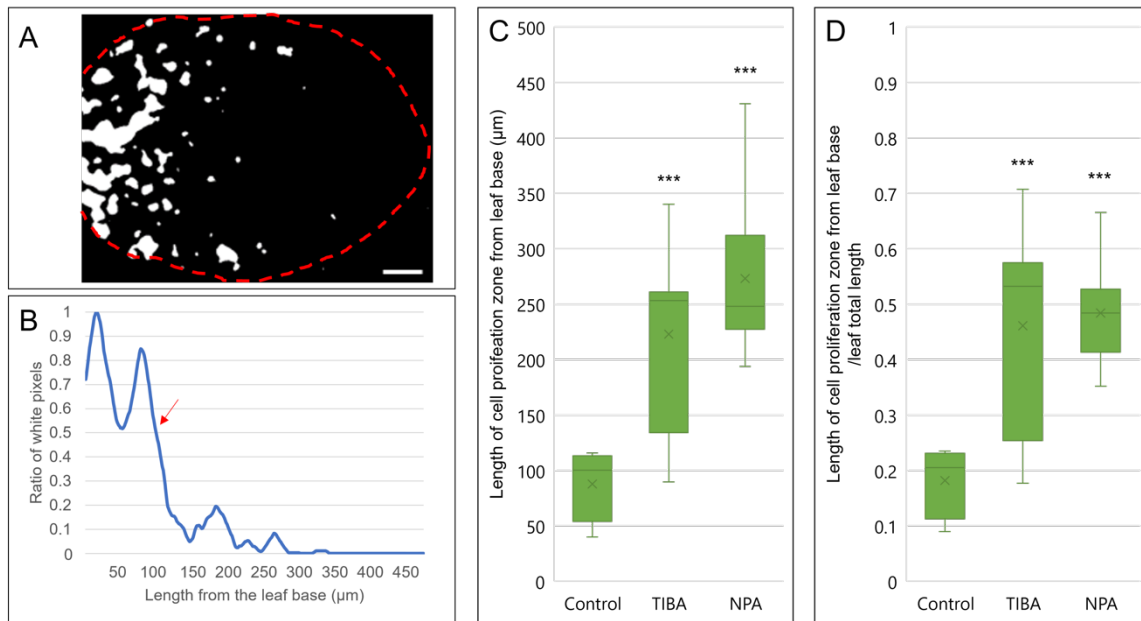

700

701 **Fig. 3** Determination of cell proliferation zone and length and the ratio of cell proliferation  
702 occupying leaf primordia.

703 A: Binary images of GUS-stained leaf primordia. Scale bar: 50 μm.

704 B: The ratio of white pixels from a binary image was calculated, and the length of the cell  
705 proliferation zone (more than 50% of the white pixels) was determined. The red arrow indicates  
706 the end of the cell proliferation zone.

707 C: Length of cell proliferation zone from the leaf base.

708 D: The ratio of cell proliferation zone to the total leaf length.

709 n = 8, Dunnett's test, \*\*\*:  $p < 0.001$

710

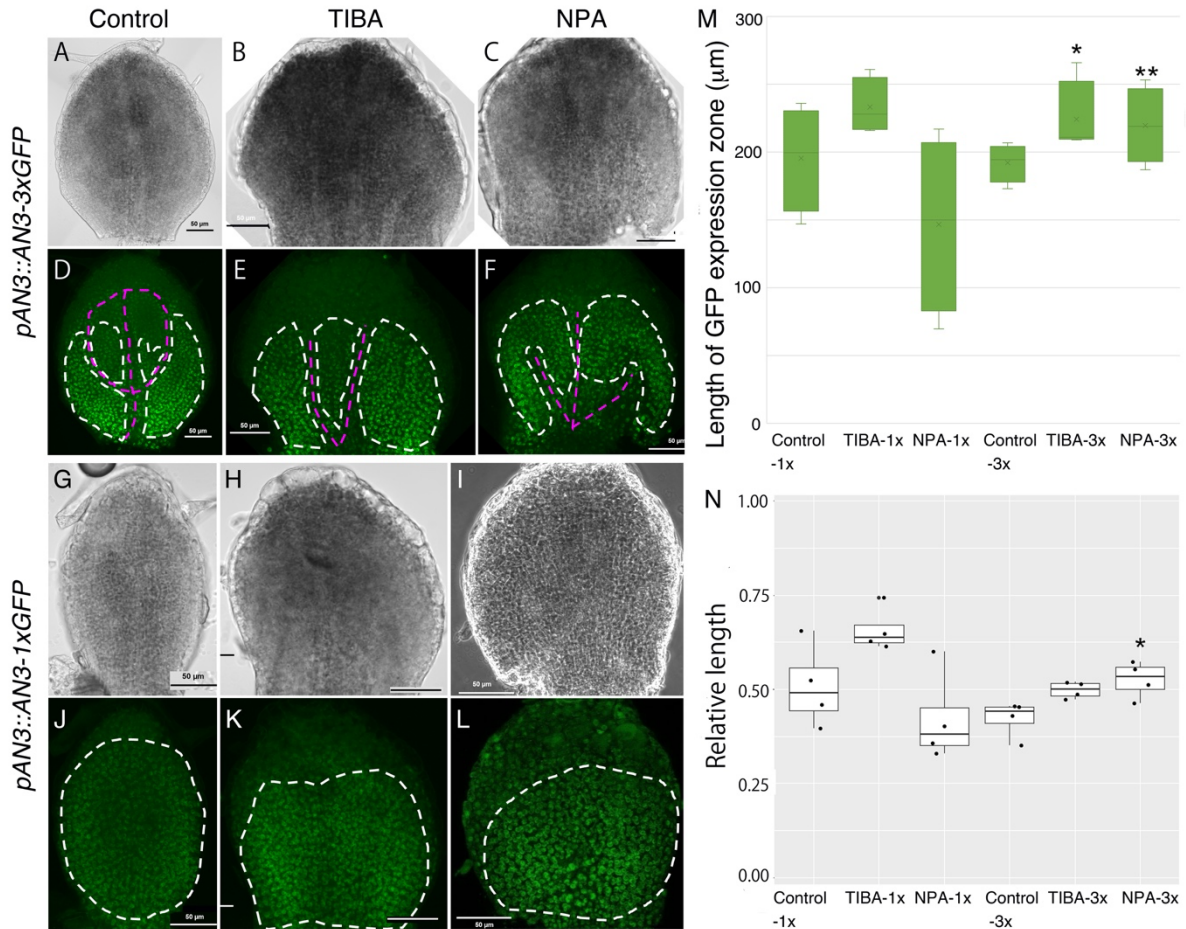

711

712 **Fig. 4** GFP localization of *an3/pAtAN3::AN3-3xGFP* (A-F) and *an3/pAtAN3::AN3-GFP* (G-  
 713 L), and their ratio of AN3-3xGFP and AN3-1xGFP localized area to the total length of leaf  
 714 primordia.

715 Control (A, D, G, J), TIBA-treated (B, E, H, K), and NPA-treated (C, F, I, L) leaf primordia (5  
 716 DAS) are shown.

717 White dotted lines indicate GFP-localized area, and magenta lines indicate vasculature.

718 M indicates the actual length of GFP expression zone measured from leaf base. From left,  
 719 *an3/pAtAN3::AN3-GFP* Control, TIBA and NPA; *an3/pAtAN3::AN3-3xGFP* Control, TIBA  
 720 and NPA. n = 4, Dunnett's test, \*:  $p < 0.05$ , \*\*:  $p < 0.001$

721 N indicates a ratio of AN3 mRNA and protein-localized area to the total length of leaf primordia.  
 722 From left, *an3/pAtAN3::AN3-GFP* Control, TIBA and NPA; *an3/pAtAN3::AN3-3xGFP*  
 723 Control, TIBA and NPA. n = 4, Dunnett's test, \*:  $p < 0.05$ . No mark implies no statistically  
 724 significant difference was observed.

725

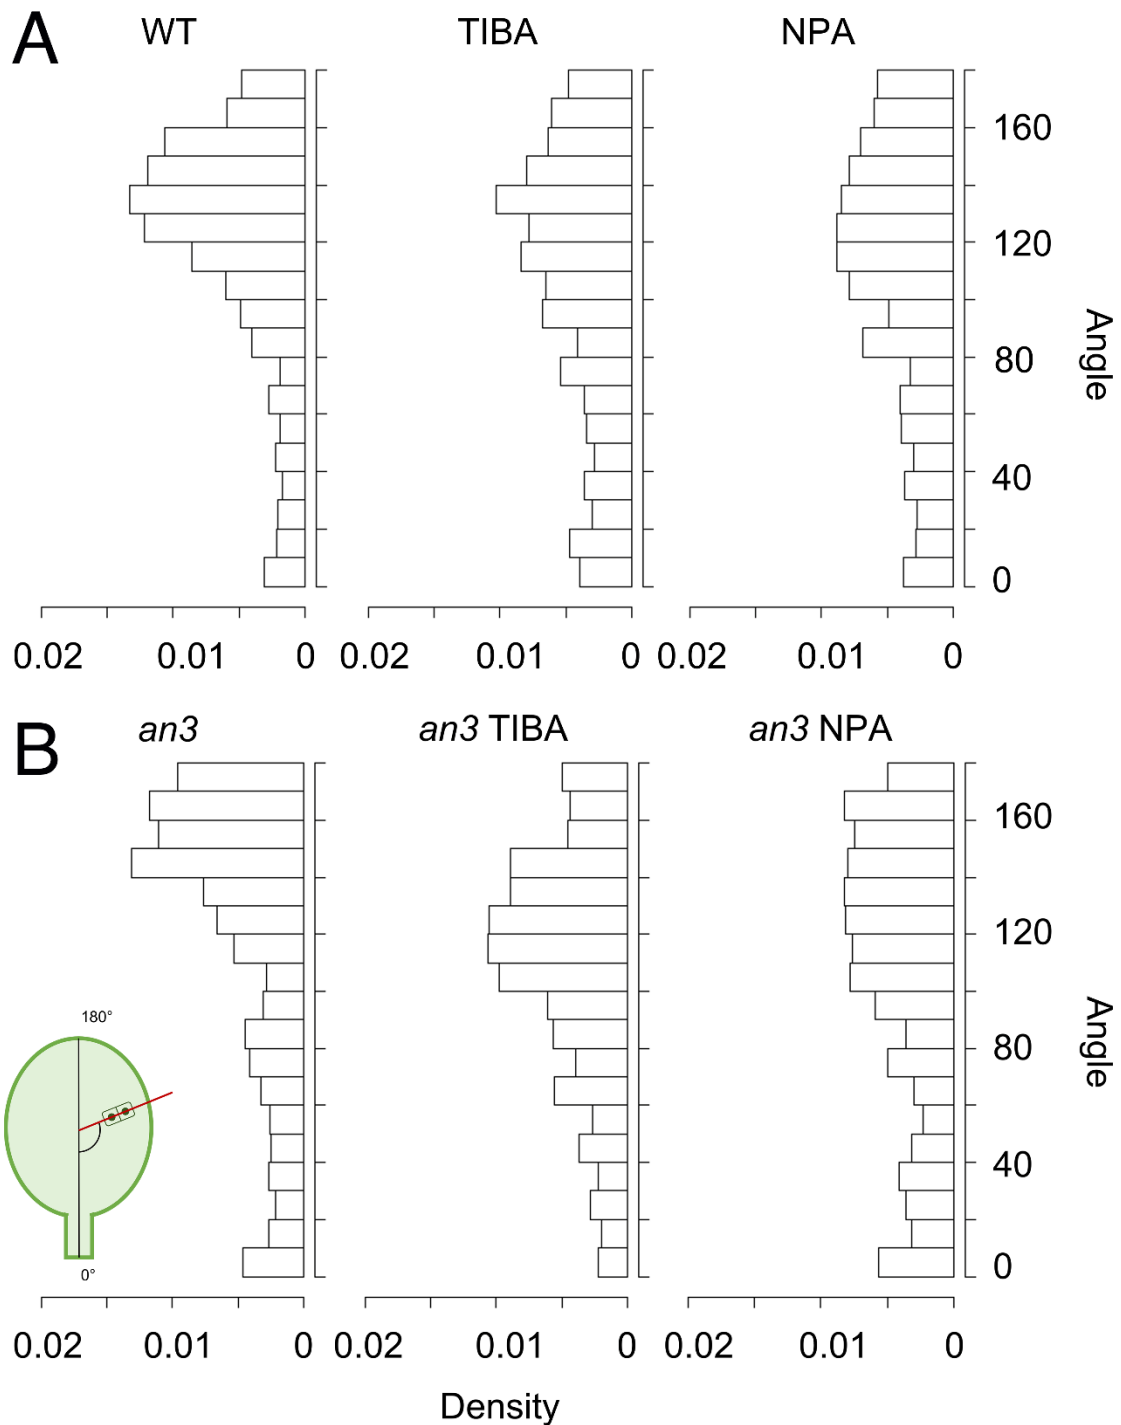

726

727 **Fig. 5** Cell division angles in leaves. Four samples were investigated for each condition.

728 A: From left, WT, TIBA, NPA; 1221, 1158, 1061 pairs of cells were analyzed, respectively.

729 B: From left, *an3* mutant, TIBA (*an3* mutant), NPA (*an3* mutant); 971, 703 and 604 pairs of

730 cells were analyzed, respectively. A schematic view of the angle measurements is inserted at

731 the lower left.



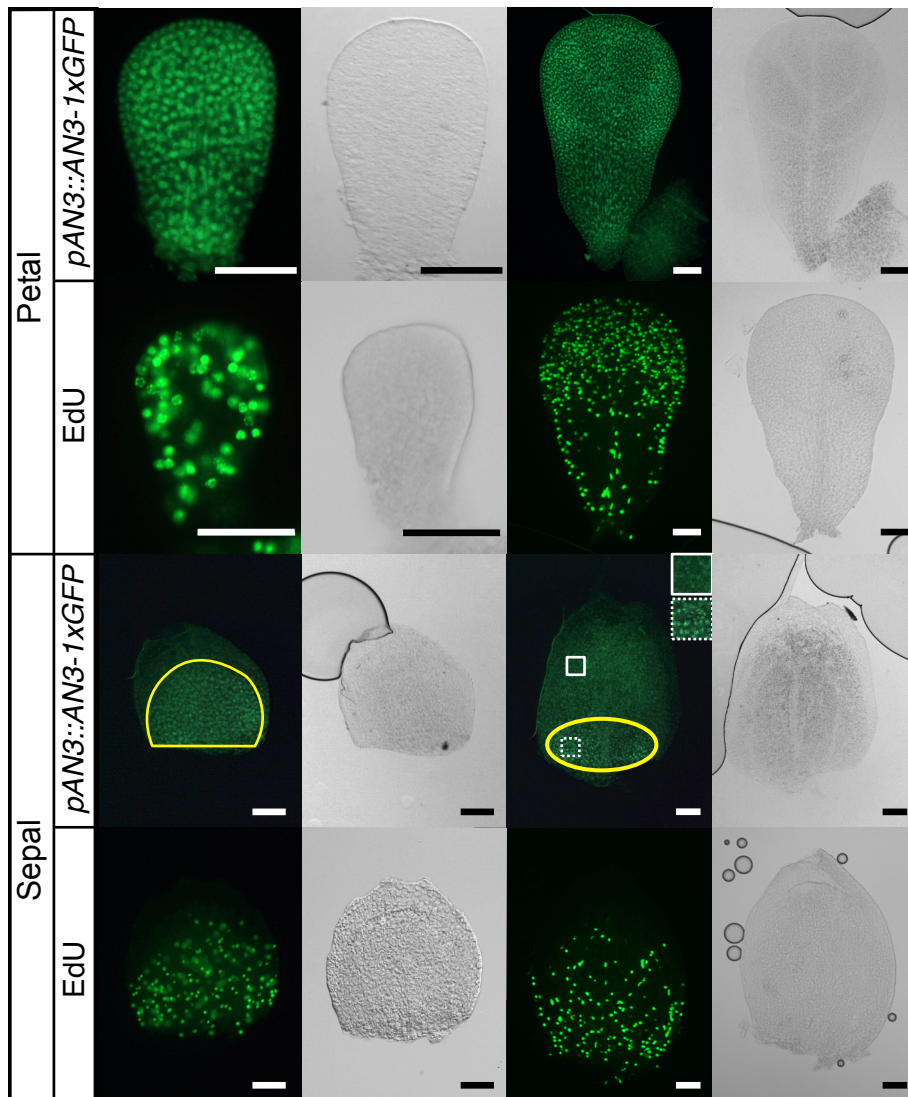

732

733 **Fig. 6** AN3-1xGFP signals and EdU staining in sepal and petal primordia.

734 The primordia in the left two columns are younger than that in the right two columns. The  
735 stage of flower from which each primordium was collected is as follows: petal left, early  
736 stage 9; petal right, stage 1; sepal left, stage 7 (approx. 250  $\mu\text{m}$ ); sepal right stage 8 (approx.  
737 450  $\mu\text{m}$ ). Normal transmitted light microscope images are shown on the right side of each  
738 fluorescent microscope image. Images of an AN3-GFP line are in the first row of each floral  
739 organ. The second row shows the floral primordia from the wild type treated with EdU. The  
740 yellow line shows areas with brighter AN3-1xGFP signals than the other part of the area in  
741 the primordia. Magnified views in each square of the sepal primordium are shown on the  
742 upper right.

743 Bar = 50  $\mu\text{m}$

744

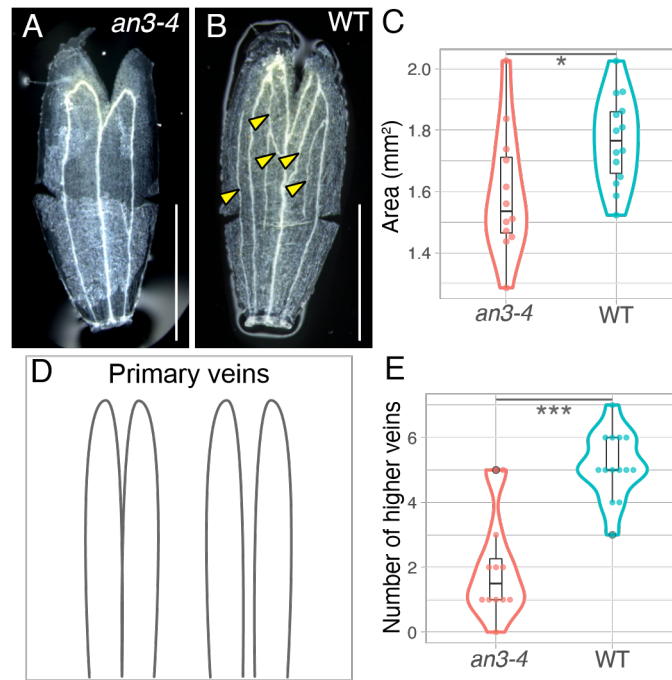

745

746 **Fig. 7** Phenotype of the sepal in the *an3-4* and the wild type. (A, B) Images of the sepal in  
747 each genotype, *an3-4*, and the wild type. Some cuts were made to flatten the organs. The  
748 yellow arrowheads point to the higher veins in the sepal. (C) The area of sepals in each  
749 genotype. (D) Two patterns of primary veins are defined in this study. (E) The number of  
750 higher veins of the sepals in each genotype. \*  $p < 0.05$ , \*\*\*  $p < 0.001$ , Bar = 500  $\mu\text{m}$ .

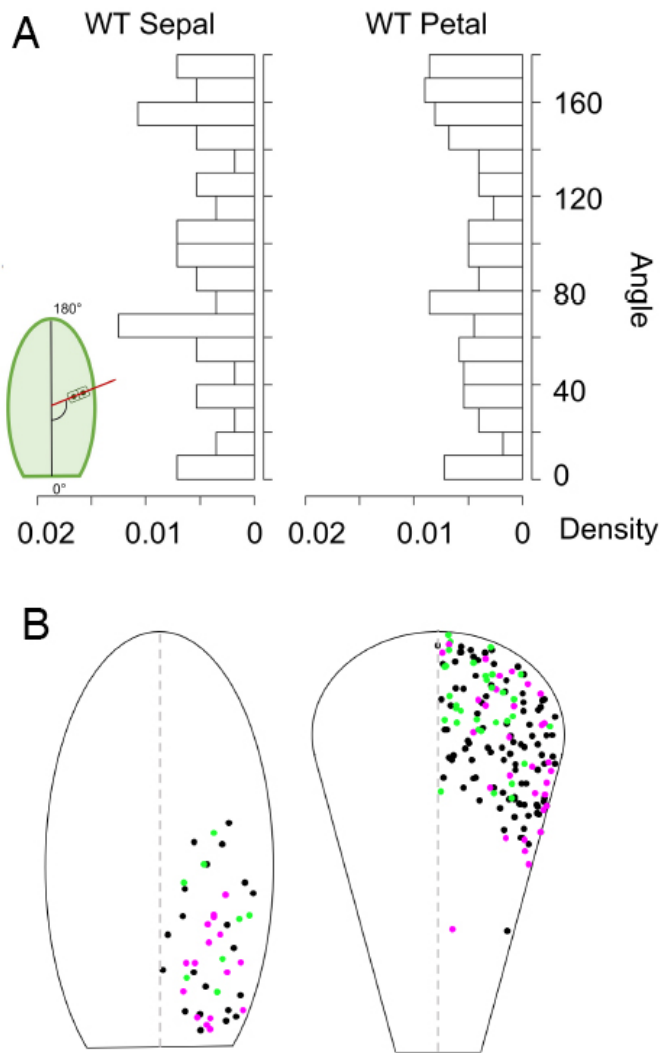

751

752 **Fig. 8** Cell division angles in floral organs.

753 (A) From left, WT sepal, WT petal; 56 and 222 pairs of cells from four samples were analyzed,

754 respectively. A schematic view of the angle measurements is inserted in the left corner. (B) Cell

755 division angle distribution in floral organs. Left: sepal; 46 pairs of cells from three primordia

756 were analyzed. Right: petal; 159 pairs of cells from three primordia were analyzed. The angles

757 are mapped to the right half of the diagram, as the organs are symmetrical. The magenta dots

758 indicate the cell division angle in 140°–180° (the upper peak in the panel A), the green dots

759 indicate 60°–90° (the lower peak in the panel A), and the black dots indicate the angles that are

760 in neither peak. n = 3

761
